# Supplementary material
Source: PubMed Central journal article supplement (PMC8094488)
Supplement: 12859_2021_4148_MOESM1_ESM.pdf [file 12859_2021_4148_MOESM1_ESM.pdf]

## Supplementary Tables

**Supplementary Table S1: Selected endpoint functions. Those functions included in subset S have their respective sign (desired drug effect) in parentheses.**

|                                                |                                                     |                                       |
|------------------------------------------------|-----------------------------------------------------|---------------------------------------|
| AMPK Signaling                                 | Fragmentation of Golgi apparatus                    | Macroautophagy of cells               |
| Antiviral response (+1)                        | Fusion of cells                                     | Macropinocytosis                      |
| Apoptosis                                      | Fusion of phagosomes                                | Mitosis                               |
| Asthma                                         | Fusion of vesicles                                  | Myocarditis (-1)                      |
| Autophagy                                      | G Beta Gamma Signaling                              | PDGF Signaling                        |
| Budding of virus (-1)                          | Glycolysis of cells                                 | PTEN Signaling                        |
| CDK5 Signaling                                 | HIV infection (-1)                                  | Phagocytosis                          |
| CXCR4 Signaling                                | HMGB1 Signaling                                     | Pneumonia (-1)                        |
| Cell cycle progression                         | Hemoglobinopathy                                    | Production of reactive oxygen species |
| Cellular homeostasis                           | Hemostasis                                          | Pulmonary Hypertension                |
| Chemotaxis                                     | Hypertension                                        | Release of virus (-1)                 |
| Clathrin mediated endocytosis                  | I-kappaB kinase/NF-kappaB cascade                   | Replication of RNA virus (-1)         |
| Coagulation of blood (-1)                      | IGF-1 Signaling                                     | Replication of coronavirus (-1)       |
| Concentration of cholesterol (-1)              | IL-1 Signaling                                      | Respiratory failure (-1)              |
| Degradation of Golgi apparatus                 | IL-2 Signaling                                      | SAPK/JNK Signaling                    |
| Degranulation of cells                         | IL-6 Signaling                                      | Stabilization of mRNA                 |
| Diabetes mellitus                              | IL-8 Signaling                                      | Synthesis of lipid (-1)               |
| Edema of pericardial cavity                    | Import of protein                                   | Synthesis of phospholipid (-1)        |
| Endocytosis (-1)                               | Infection by RNA virus (-1)                         | Synthesis of reactive oxygen species  |
| Endoplasmic reticulum stress response of cells | Inflammation of respiratory system (-1)             | Transport of virus (-1)               |
| Engulfment of cells                            | Inhibition of ARE-Mediated mRNA Degradation Pathway | Viral Infection                       |
| Entrance of virus (-1)                         | Internalization of protein                          | Viral life cycle (-1)                 |
| Exocytosis (-1)                                | Interphase                                          |                                       |
| Fibrosis (-1)                                  | M phase                                             |                                       |

**Supplementary Table S2: Significant biological processes.**

|                                           | <b>p-value</b> | <b>preselected endpoint</b> |
|-------------------------------------------|----------------|-----------------------------|
| Accumulation of triacylglycerol           | 3.27341e-05    |                             |
| Reproduction                              | 5.83445e-05    |                             |
| Release of 5-hydroxytryptamine            | 0.000156675    |                             |
| Quantity of hdl cholesterol in blood      | 0.000516416    |                             |
| Maturation of erythroid precursor cells   | 0.000519996    |                             |
| Quantity of glycosphingolipid             | 0.000597035    |                             |
| Esterification of cholesterol             | 0.00109144     |                             |
| Quantity of sperm                         | 0.0011722      |                             |
| Incorporation of triacylglycerol          | 0.00130617     |                             |
| Glucose tolerance                         | 0.00177419     |                             |
| Exocytosis by neurons                     | 0.0022751      |                             |
| Lean body mass                            | 0.00256448     |                             |
| Quantity of adipose tissue                | 0.00257632     |                             |
| Excretion of protein                      | 0.00267917     |                             |
| Shape change of epithelial cell lines     | 0.00299916     |                             |
| Formation of aggresome                    | 0.00299916     |                             |
| Uptake of cholesterol                     | 0.00314775     |                             |
| Quantity of chondrocytes                  | 0.00321366     |                             |
| Excitation of pyramidal neurons           | 0.00355631     |                             |
| Vascular resistance of kidney             | 0.00368978     |                             |
| Consumption of oxygen                     | 0.0037325      |                             |
| Quantity of burst-forming erythroid cells | 0.0037325      |                             |
| Fragmentation of Golgi apparatus          | 0.00386367     | X                           |
| Quantity of palmitoleic acid              | 0.00386367     |                             |
| Relaxation of cardiac muscle              | 0.00386367     |                             |
| Degradation of Golgi apparatus            | 0.00386769     | X                           |
| Synthesis of tretinoin                    | 0.00419759     |                             |
| Cell spreading of fibroblast cell lines   | 0.00500035     |                             |
| Contraction of arteriole                  | 0.00515229     |                             |
| Relaxation of vein                        | 0.0057544      |                             |
| Activation of heart                       | 0.0057544      |                             |
| Focal necrosis                            | 0.0057544      |                             |
| Oncogene-induced senescence of cells      | 0.00579429     |                             |
| Beta-oxidation of palmitic acid           | 0.006223       |                             |
| Arousal                                   | 0.00632412     |                             |
| Initiation of transcription               | 0.00666807     |                             |

|                                                   |            |   |
|---------------------------------------------------|------------|---|
| Degranulation of natural killer cells             | 0.00669885 |   |
| Concentration of cholesterol                      | 0.00717794 | X |
| Cell viability of vascular smooth muscle cells    | 0.00744732 |   |
| Insulin sensitivity                               | 0.00763836 |   |
| Release of beta-estradiol                         | 0.00770903 |   |
| Release of virus                                  | 0.00775895 | X |
| Percentage body fat                               | 0.00820352 |   |
| Nitration of protein                              | 0.00885116 |   |
| Development of erythroid cell lines               | 0.00895365 |   |
| Quantity of ldl cholesterol in blood              | 0.00937562 |   |
| Mass of organism                                  | 0.00937562 |   |
| M2 polarization                                   | 0.00937562 |   |
| Intravasation of cells                            | 0.00959401 |   |
| Internalization by epithelial cell lines          | 0.00959401 |   |
| Development of respiratory tract                  | 0.00961612 |   |
| Hydrolysis of cholesterol ester                   | 0.00966051 |   |
| Contractility of left ventricle                   | 0.00966051 |   |
| Erection                                          | 0.00990832 |   |
| Trafficking of leukocytes                         | 0.0102802  |   |
| Secretion of 5-hydroxytryptamine                  | 0.0102802  |   |
| Formation of dendritic spines                     | 0.0103039  |   |
| Quantity of GH in blood                           | 0.010666   |   |
| Transport of 5-hydroxytryptamine                  | 0.0107895  |   |
| Cell proliferation of pituitary cancer cell lines | 0.0107895  |   |
| Concentration of triacylglycerol                  | 0.0108393  |   |
| Synthesis of triacylglycerol                      | 0.0113501  |   |
| Inhibition of neurons                             | 0.011995   |   |
| Formation of adrenal gland                        | 0.011995   |   |
| Quantity of secretory vesicles                    | 0.0131522  |   |
| Incorporation of long chain fatty acid            | 0.0133968  |   |
| Formation of lung                                 | 0.0137721  |   |
| Migration of kidney cells                         | 0.0139316  |   |
| Secretion of granules                             | 0.0139316  |   |
| Remodeling of artery                              | 0.0142561  |   |
| Distribution of sphingolipid                      | 0.0143549  |   |
| Secretion of epinephrine                          | 0.0152055  |   |
| Concentration of D-glucose                        | 0.0152757  |   |
| Energy expenditure                                | 0.0163305  |   |
| Localization of phosphatidylserine                | 0.0169434  |   |
| Phagocytosis of T lymphocytes                     | 0.0171791  |   |

|                                                  |           |  |
|--------------------------------------------------|-----------|--|
| Proliferation of dermal fibroblasts              | 0.0171791 |  |
| Accumulation of hormone                          | 0.0172187 |  |
| Beat of cardiomyocytes                           | 0.0172982 |  |
| Extraintestinal functional disorder              | 0.0174582 |  |
| Efferocytosis                                    | 0.0179061 |  |
| Appetite                                         | 0.0179061 |  |
| Entrance of HIV-1                                | 0.0184502 |  |
| Utilization of D-glucose                         | 0.0186209 |  |
| Quantity of 5,6,7,8-tetrahydrobiopterin          | 0.0186209 |  |
| Angiogenesis of skin                             | 0.0186209 |  |
| Quantity of long-chain acyl-coenzyme A           | 0.0190985 |  |
| Endurance                                        | 0.0193642 |  |
| Activation of dopaminergic neurons               | 0.0197242 |  |
| Exocytosis of synaptic vesicles                  | 0.0199067 |  |
| Function of central nervous system               | 0.0200447 |  |
| Quantity of mitochondria                         | 0.0203236 |  |
| Insulin sensitivity index                        | 0.0204644 |  |
| Maturation of granulocytes                       | 0.0210378 |  |
| Translocation of carbohydrate                    | 0.0215278 |  |
| Concentration of bile acid                       | 0.0215278 |  |
| Quantity of cerebral cortex cells                | 0.0215278 |  |
| Relaxation of aortic ring tissue                 | 0.0215278 |  |
| Release of GABA                                  | 0.0215278 |  |
| Quantity of ketone body                          | 0.0215774 |  |
| Quantity of retinal ganglion cells               | 0.021727  |  |
| Strength of muscle                               | 0.021727  |  |
| Survival of red blood cells                      | 0.0224905 |  |
| Proliferation of oligodendrocyte precursor cells | 0.0228034 |  |
| Increased clearance of creatinine                | 0.0231739 |  |
| Release of norepinephrine                        | 0.0231739 |  |
| Quantity of glomerular cells                     | 0.0239332 |  |
| Development of endoderm                          | 0.024322  |  |
| Macroautophagy                                   | 0.024322  |  |
| Migration of peripheral blood lymphocytes        | 0.024322  |  |
| Fractional shortening of left ventricle          | 0.024322  |  |
| Binding of E box motif                           | 0.024322  |  |
| Adipogenesis of adipoblasts                      | 0.024322  |  |
| Distribution of glycolipid                       | 0.0246037 |  |
| Acoustic startle response                        | 0.0247172 |  |
| Premature senescence of lung cell lines          | 0.0247172 |  |

|                                          |           |  |
|------------------------------------------|-----------|--|
| Basal metabolic rate                     | 0.0253513 |  |
| Synthesis of cholesterol ester           | 0.025527  |  |
| Contraction of heart ventricle           | 0.0257632 |  |
| Homing of fibroblast cell lines          | 0.0258226 |  |
| Conversion of sterol                     | 0.0264241 |  |
| Pressure of heart                        | 0.0264241 |  |
| Survival of dopaminergic neurons         | 0.0264241 |  |
| Translocation of lipid                   | 0.0264241 |  |
| Development of pulmonary artery          | 0.0271644 |  |
| Innervation of cells                     | 0.0271644 |  |
| Concentration of tretinoin               | 0.0273527 |  |
| Apoptosis of B lymphoblastoid cell lines | 0.0281838 |  |
| Cell viability of neuroglia              | 0.0281838 |  |
| Mobility of mice                         | 0.0281838 |  |
| Quantity of TNF in blood                 | 0.0287078 |  |
| Patterning of cells                      | 0.0288403 |  |
| Hydroxylation of steroid                 | 0.0288403 |  |
| Uptake of polyunsaturated fatty acids    | 0.0288403 |  |
| Quantity of endothelial cells            | 0.0289734 |  |
| Release of prostaglandin D2              | 0.0300608 |  |
| Apoptosis of effector T lymphocytes      | 0.0300608 |  |
| Movement of lipid                        | 0.0300608 |  |
| Liquid preference                        | 0.0302691 |  |
| Metabolism of sterol                     | 0.0306196 |  |
| Formation of apoptotic bodies            | 0.0306196 |  |
| Vasodilation of artery                   | 0.0309742 |  |
| Long-term memory                         | 0.0311172 |  |
| Quantity of acetylcholine                | 0.0320627 |  |
| Migration of nervous tissue cell lines   | 0.0320627 |  |
| Interaction of bone marrow stromal cells | 0.0325087 |  |
| Apoptosis of heart                       | 0.0335738 |  |
| Efflux of choline-phospholipid           | 0.0341193 |  |
| Contraction of pulmonary artery          | 0.0341193 |  |
| Body temperature                         | 0.0341979 |  |
| Deposition of glycogen                   | 0.0341979 |  |
| Spermiogenesis                           | 0.034435  |  |
| Quantity of IgG3                         | 0.0360579 |  |
| Binding of cellular membrane             | 0.0363078 |  |
| Migration of neuroblasts                 | 0.0363078 |  |
| Biosynthesis of stearic acid             | 0.0363078 |  |

|                                       |           |  |
|---------------------------------------|-----------|--|
| Cell division of lymphocytes          | 0.0363915 |  |
| Cytotoxic reaction of cells           | 0.0370681 |  |
| Mass of abdominal fat pad             | 0.0370681 |  |
| Maturation of megakaryocytes          | 0.0380189 |  |
| Senescence of dermal fibroblasts      | 0.0380189 |  |
| Adhesion of glomerular cells          | 0.0385478 |  |
| Induction of cellular protrusions     | 0.0385478 |  |
| Response of blood platelets           | 0.0385478 |  |
| Synthesis of norepinephrine           | 0.0385478 |  |
| Relaxation of coronary artery         | 0.0385478 |  |
| Place aversion                        | 0.0385478 |  |
| Quantity of ovarian cortex cells      | 0.0389942 |  |
| Migration of lung cancer cell lines   | 0.0389942 |  |
| Quantity of islet cells               | 0.0389942 |  |
| Cell movement of cytotoxic T cells    | 0.0399945 |  |
| Deposition of triacylglycerol         | 0.0399945 |  |
| Regeneration of nerves                | 0.0403645 |  |
| Contraction of portal vein            | 0.0403645 |  |
| Cardiovascular toxicity               | 0.0405509 |  |
| Quantity of lysosome                  | 0.040738  |  |
| Activation of peritoneal mast cells   | 0.040738  |  |
| Depression-related behavior           | 0.0408319 |  |
| Transmission of sterol                | 0.0408319 |  |
| Development of liver                  | 0.0408319 |  |
| Modification of anion                 | 0.0415911 |  |
| Conversion of hormone                 | 0.0415911 |  |
| Metabolism of porphyrin               | 0.0418794 |  |
| Proliferation of Schwann cells        | 0.0420727 |  |
| Vertical rearing                      | 0.0420727 |  |
| Metabolism of polyamines              | 0.0429536 |  |
| Habituation                           | 0.0429536 |  |
| Oxidation of hormone                  | 0.0429536 |  |
| Myelination of cells                  | 0.0429536 |  |
| Cell spreading of kidney cell lines   | 0.0429536 |  |
| Oxidation of D-glucose                | 0.0429536 |  |
| Quantity of taurine                   | 0.0429536 |  |
| Quantity of motor neurons             | 0.0433511 |  |
| Relaxation of corpus cavernosum penis | 0.0433511 |  |
| Quantity of insulin in blood          | 0.0433511 |  |
| Oxidation of protein                  | 0.0442588 |  |

|                                     |           |  |
|-------------------------------------|-----------|--|
| Flux of L-amino acid                | 0.0451856 |  |
| Export of metal ion                 | 0.0457088 |  |
| Blood pressure                      | 0.0457088 |  |
| Accumulation of lipid droplets      | 0.0457088 |  |
| Chemotaxis of tumor cells           | 0.0458142 |  |
| Cell viability of dermal cells      | 0.0458142 |  |
| Quantity of lysophosphatidylcholine | 0.0458142 |  |
| Photoresponse                       | 0.0477529 |  |
| Quantity of ganglion cells          | 0.0477529 |  |
| Cell death of megakaryocytes        | 0.0477529 |  |
| Ejection fraction of left ventricle | 0.0485289 |  |
| Binding of vesicles                 | 0.0485289 |  |
| Permeability of blood-brain barrier | 0.0485289 |  |
| Synthesis of dihydrotestosterone    | 0.0485289 |  |
| Morphogenesis of head               | 0.0488652 |  |

**Supplementary Table S3: Significant diseases.**

|                                           | <b>p-value</b> | <b>preselected endpoint</b> |
|-------------------------------------------|----------------|-----------------------------|
| Quantity of gastric ulcer                 | 0.000461318    |                             |
| Hypophagia                                | 0.000620869    |                             |
| Atrial fibrillation                       | 0.00143219     |                             |
| Musculoskeletal pain                      | 0.00196336     |                             |
| Allergic rhinitis                         | 0.00267917     |                             |
| Damage of retina                          | 0.00326588     |                             |
| Cholangitis                               | 0.00334195     |                             |
| Fibrosis of heart ventricle               | 0.00386367     |                             |
| Dysfunction of endothelial tissue         | 0.00438531     |                             |
| Cardiotoxicity                            | 0.00453942     |                             |
| Steatohepatitis                           | 0.00454988     |                             |
| Pulmonary alveolar proteinosis            | 0.00463447     |                             |
| Foam cells                                | 0.00480839     |                             |
| Weight gain                               | 0.00555904     |                             |
| Abnormality of left ventricle             | 0.00744732     |                             |
| Formation of gallstone                    | 0.00744732     |                             |
| Wheeze                                    | 0.00809096     |                             |
| Diabetic nephropathy                      | 0.00877001     |                             |
| Injury of cerebrum                        | 0.00879023     |                             |
| Nonalcoholic fatty liver disease          | 0.0102802      |                             |
| Fibrosis of interstitial tissue           | 0.011749       |                             |
| Lysosomal storage disease                 | 0.011995       |                             |
| Duchenne muscular dystrophy               | 0.0127057      |                             |
| Myocardial infarction                     | 0.0127057      |                             |
| Fibrosis of connective tissue             | 0.0128529      |                             |
| Exencephaly                               | 0.0128529      |                             |
| Hip fracture                              | 0.0143549      |                             |
| Coronary artery disease                   | 0.0149624      |                             |
| Metabolic syndrome X                      | 0.0156315      |                             |
| Interstitial fibrosis                     | 0.0157398      |                             |
| Degeneration of outer nuclear layer       | 0.0160694      |                             |
| Syndactyly                                | 0.016788       |                             |
| Valvular regurgitation of semilunar valve | 0.0171791      |                             |
| Atherogenesis                             | 0.0186209      |                             |
| Alcoholism                                | 0.0190985      |                             |
| Hyperplasia of apud cells                 | 0.0204644      |                             |

|                                 |           |   |
|---------------------------------|-----------|---|
| Abnormality of atrium           | 0.0210378 |   |
| Hyperglycemia                   | 0.021727  |   |
| Primary hypertension            | 0.0226464 |   |
| Sleep Disorders                 | 0.0226464 |   |
| Fibrosis of muscle              | 0.0229615 |   |
| Hyperplasia of adrenal gland    | 0.0230675 |   |
| Damage of cardiac muscle        | 0.0230675 |   |
| Stenosis of vasculature         | 0.0231739 |   |
| Diastolic dysfunction           | 0.0231739 |   |
| Insulin tolerance               | 0.0240436 |   |
| Obesity                         | 0.024322  |   |
| Fibrosis of renal glomerulus    | 0.0247172 |   |
| Synostosis                      | 0.0258226 |   |
| Formation of ulcer              | 0.0264241 |   |
| Oxidative stress                | 0.0266686 |   |
| Inflammation of spinal cord     | 0.0271644 |   |
| Fatigue of muscle               | 0.0273527 |   |
| Sedation                        | 0.0288403 |   |
| Atrophy of skin                 | 0.0306196 |   |
| Pneumonia                       | 0.0309415 | X |
| Hypertension                    | 0.0309415 | X |
| Angina pectoris                 | 0.0311172 |   |
| Bradycardia                     | 0.0325087 |   |
| Impaired glucose tolerance      | 0.0325087 |   |
| Formation of granulation tissue | 0.0341979 |   |
| Abnormal brain myelination      | 0.034435  |   |
| Damage of cerebral cortex       | 0.0353997 |   |
| Chronic kidney disease          | 0.0353997 |   |
| Severe arthritis                | 0.036141  |   |
| Dysfunction of heart            | 0.0363078 |   |
| Bleeding of skin                | 0.0363078 |   |
| Hypertrophic cardiomyopathy     | 0.0363078 |   |
| Thrombotic microangiopathy      | 0.0363078 |   |
| Ptosis                          | 0.0380189 |   |
| Beta thalassemia                | 0.0387258 |   |
| Hypoalbuminemia                 | 0.0415911 |   |
| Dysplasia of bone               | 0.0429536 |   |
| Dryness of skin                 | 0.0429536 |   |
| Edema of pericardial cavity     | 0.0442588 | X |
| Hypomyelination                 | 0.0442588 |   |

|                                         |           |   |
|-----------------------------------------|-----------|---|
| Non-insulin-dependent diabetes mellitus | 0.0445656 |   |
| Akinesia                                | 0.0445656 |   |
| Gliosis of central nervous system       | 0.0445656 |   |
| Postoperative nausea and vomiting       | 0.0451856 |   |
| Anovulation                             | 0.0452898 |   |
| Immunosuppression                       | 0.0457088 |   |
| Hypertriglyceridemia                    | 0.0465586 |   |
| Huntington Disease                      | 0.0476431 |   |
| Fibrosis of blood vessel                | 0.0477529 |   |
| Vascular injury                         | 0.0477529 |   |
| Chronic brain damage                    | 0.0485289 |   |
| Cirrhosis of liver                      | 0.0485289 |   |
| Albuminuria                             | 0.0485289 |   |
| Anophthalmia or microphthalmia          | 0.0488652 |   |
| Viral Infection                         | 0.0540653 | X |

#### Supplementary Table S4: Significant pathways.

|                                             | <b>p-value</b> | <b>preselected endpoint</b> |
|---------------------------------------------|----------------|-----------------------------|
| Dopamine Receptor Signaling                 | 0.00332482     |                             |
| Signaling by Rho Family GTPases             | 0.0137595      |                             |
| Sonic Hedgehog Signaling                    | 0.0182462      |                             |
| Paxillin Signaling                          | 0.0217485      |                             |
| Calcium Signaling                           | 0.032472       |                             |
| UVA-Induced MAPK Signaling                  | 0.0379926      |                             |
| Xenobiotic Metabolism PXR Signaling Pathway | 0.0400179      |                             |
| Cdc42 Signaling                             | 0.0421185      |                             |
| CDK5 Signaling                              | 0.0453108      | X                           |
| Apelin Adipocyte Signaling Pathway          | 0.0484869      |                             |
| Coagulation System                          | 0.0488837      |                             |

**Supplementary Table S5: Consistent drugs included in hypothesis networks.**

| <b>drug</b>            | <b>targets</b>  | <b>endpoint functions</b>                                                       |
|------------------------|-----------------|---------------------------------------------------------------------------------|
| 6-aminocaproic acid    | PLAT            | pneumonia                                                                       |
| ABT-414                | EGFR            | entrance of virus                                                               |
| AC0010MA               | EGFR            | entrance of virus                                                               |
| AP32788                | EGFR            | entrance of virus                                                               |
| AZD3759                | EGFR            | entrance of virus                                                               |
| BPI-7711               | EGFR            | entrance of virus                                                               |
| D-0316                 | EGFR            | entrance of virus                                                               |
| FG-3019                | CCN2            | fibrosis                                                                        |
| GS-5745                | MMP9            | hiv infection, replication of coronavirus, viral infection                      |
| HS-10296               | EGFR            | entrance of virus                                                               |
| KX-01                  | SRC             | coagulation of blood, entrance of virus, exocytosis                             |
| N-methylscopolamine    | CHRM3           | coagulation of blood, exocytosis, hiv infection, synthesis of phospholipid      |
| PEG-interferon alfa-2a | IFNAR1          | release of virus, replication of coronavirus, viral infection, viral life cycle |
| abciximab              | ITGAV,<br>ITGB3 | entrance of virus, fibrosis                                                     |
| acitretin              | RXRB            | inflammation of respiratory system                                              |
| aclidinium             | CHRM3           | coagulation of blood, exocytosis, hiv infection, synthesis of phospholipid      |
| adapalene              | RXRB            | inflammation of respiratory system                                              |
| afatinib               | EGFR            | entrance of virus                                                               |
| aflibercept            | VEGFA           | entrance of virus, synthesis of phospholipid                                    |
| alcaftadine            | HRH1            | inflammation of respiratory system, release of virus, viral life cycle          |
| alflutinib             | EGFR            | entrance of virus                                                               |
| alirocumab             | PCSK9           | concentration of cholesterol                                                    |
| alitretinoin           | RXRB            | inflammation of respiratory system                                              |
| amiloride              | SLC9A1          | budding of virus                                                                |
| anakinra               | IL1R1           | fibrosis                                                                        |
| antazoline             | HRH1            | inflammation of respiratory system, release of virus, viral life cycle          |
| apixaban               | F10             | coagulation of blood                                                            |
| argatroban             | F2R             | exocytosis, synthesis of phospholipid                                           |
| aripiprazole           | HRH1            | inflammation of respiratory system, release of virus, viral life cycle          |
| asenapine              | HRH1            | inflammation of respiratory system, release of virus, viral life cycle          |

|                             |              |                                                                                                                                                    |
|-----------------------------|--------------|----------------------------------------------------------------------------------------------------------------------------------------------------|
| atracurium                  | CHRNA3       | pulmonary hypertension                                                                                                                             |
| atropine                    | CHRM3        | coagulation of blood, exocytosis, hiv infection, synthesis of phospholipid                                                                         |
| azelastine                  | HRH1         | inflammation of respiratory system, release of virus, viral life cycle                                                                             |
| becaplermin                 | PDGFRB       | respiratory failure                                                                                                                                |
| beclomethasone              | NR3C1        | pneumonia                                                                                                                                          |
| beclomethasone dipropionate | NR3C1        | pneumonia                                                                                                                                          |
| benztropine                 | CHRM3        | coagulation of blood, exocytosis, hiv infection, synthesis of phospholipid                                                                         |
| bepotastine                 | HRH1         | inflammation of respiratory system, release of virus, viral life cycle                                                                             |
| betamethasone               | NR3C1        | pneumonia                                                                                                                                          |
| betamethasone dipropionate  | NR3C1        | pneumonia                                                                                                                                          |
| betamethasone valerate      | NR3C1        | pneumonia                                                                                                                                          |
| betrixaban                  | F10          | coagulation of blood                                                                                                                               |
| bexarotene                  | RXRB         | inflammation of respiratory system                                                                                                                 |
| bilastine                   | HRH1         | inflammation of respiratory system, release of virus, viral life cycle                                                                             |
| binimetinib                 | MAPK1        | replication of rna virus, viral infection                                                                                                          |
| biperiden                   | CHRM3        | coagulation of blood, exocytosis, hiv infection, synthesis of phospholipid                                                                         |
| bivalirudin                 | F2R          | exocytosis, synthesis of phospholipid                                                                                                              |
| bosutinib                   | SRC          | coagulation of blood, entrance of virus, exocytosis                                                                                                |
| brigatinib                  | EGFR         | entrance of virus                                                                                                                                  |
| brompheniramine             | CHRM3, HRH1  | coagulation of blood, exocytosis, hiv infection, inflammation of respiratory system, release of virus, synthesis of phospholipid, viral life cycle |
| capivasertib                | AKT1         | exocytosis, hiv infection, infection by rna virus                                                                                                  |
| carbinoxamine               | CHRM3, HRH1  | coagulation of blood, exocytosis, hiv infection, inflammation of respiratory system, release of virus, synthesis of phospholipid, viral life cycle |
| cariprazine                 | HRH1         | inflammation of respiratory system, release of virus, viral life cycle                                                                             |
| cetirizine                  | HRH1         | inflammation of respiratory system, release of virus, viral life cycle                                                                             |
| cetuximab                   | EGFR         | entrance of virus                                                                                                                                  |
| chlorpromazine              | HRH1         | inflammation of respiratory system, release of virus, viral life cycle                                                                             |
| ciclesonide                 | NR3C1        | pneumonia                                                                                                                                          |
| cilengitide                 | ITGAV, ITGB3 | entrance of virus, fibrosis                                                                                                                        |

|                          |               |                                                                                                                                                    |
|--------------------------|---------------|----------------------------------------------------------------------------------------------------------------------------------------------------|
| cisatracurium            | CHRM3, CHRNA3 | coagulation of blood, exocytosis, hiv infection, pulmonary hypertension, synthesis of phospholipid                                                 |
| clemastine               | HRH1          | inflammation of respiratory system, release of virus, viral life cycle                                                                             |
| clobetasol propionate    | NR3C1         | pneumonia                                                                                                                                          |
| clocortolone pivalate    | NR3C1         | pneumonia                                                                                                                                          |
| cortisone acetate        | NR3C1         | pneumonia                                                                                                                                          |
| cyproheptadine           | HRH1          | inflammation of respiratory system, release of virus, viral life cycle                                                                             |
| dacomitinib              | EGFR          | entrance of virus                                                                                                                                  |
| dalteparin               | F10, VEGFA    | coagulation of blood, entrance of virus, synthesis of phospholipid                                                                                 |
| darifenacin              | CHRM3         | coagulation of blood, exocytosis, hiv infection, synthesis of phospholipid                                                                         |
| dasatinib                | SRC           | coagulation of blood, entrance of virus, exocytosis                                                                                                |
| daunorubicin             | POR           | clathrin mediated endocytosis, concentration of cholesterol, entrance of virus                                                                     |
| deacylcortivazol         | NR3C1         | pneumonia                                                                                                                                          |
| deligoparin              | F10           | coagulation of blood                                                                                                                               |
| desloratadine            | HRH1          | inflammation of respiratory system, release of virus, viral life cycle                                                                             |
| desonide                 | NR3C1         | pneumonia                                                                                                                                          |
| desoximetasone           | NR3C1         | pneumonia                                                                                                                                          |
| dexamethasone            | NR3C1         | pneumonia                                                                                                                                          |
| dexamethasone 21-acetate | NR3C1         | pneumonia                                                                                                                                          |
| dexamethasone phosphate  | NR3C1         | pneumonia                                                                                                                                          |
| dexchlorpheniramine      | HRH1          | inflammation of respiratory system, release of virus, viral life cycle                                                                             |
| difluprednate            | NR3C1         | pneumonia                                                                                                                                          |
| diphenhydramine          | CHRM3, HRH1   | coagulation of blood, exocytosis, hiv infection, inflammation of respiratory system, release of virus, synthesis of phospholipid, viral life cycle |
| doxepin                  | CHRM3, HRH1   | coagulation of blood, exocytosis, hiv infection, inflammation of respiratory system, release of virus, synthesis of phospholipid, viral life cycle |
| doxorubicin              | POR           | clathrin mediated endocytosis, concentration of cholesterol, entrance of virus                                                                     |
| doxylamine               | HRH1          | inflammation of respiratory system, release of virus, viral life cycle                                                                             |
| edoxaban                 | F10           | coagulation of blood                                                                                                                               |
| emedastine               | HRH1          | inflammation of respiratory system, release of virus, viral life cycle                                                                             |
| enoxaparin               | F10           | coagulation of blood                                                                                                                               |

|                          |               |                                                                            |
|--------------------------|---------------|----------------------------------------------------------------------------|
| enzastaurin              | AKT1, AKT2    | exocytosis, hiv infection, infection by rna virus, pulmonary hypertension  |
| epinastine               | HRH1          | inflammation of respiratory system, release of virus, viral life cycle     |
| eptifibatide             | ITGB3         | entrance of virus                                                          |
| eritoran                 | TLR4          | coagulation of blood                                                       |
| erlotinib                | EGFR          | entrance of virus                                                          |
| etanercept               | TNF           | transport of virus                                                         |
| etretinate               | RXRΒ          | inflammation of respiratory system                                         |
| ezetimibe                | NPC1L1, SOAT1 | concentration of cholesterol                                               |
| fesoterodine             | CHRM3         | coagulation of blood, exocytosis, hiv infection, synthesis of phospholipid |
| fevipirant               | PTGDR2        | pulmonary hypertension                                                     |
| fexofenadine             | HRH1          | inflammation of respiratory system, release of virus, viral life cycle     |
| flavoxate                | CHRM3         | coagulation of blood, exocytosis, hiv infection, synthesis of phospholipid |
| flunisolide              | NR3C1         | pneumonia                                                                  |
| fluocinolone acetonide   | NR3C1         | pneumonia                                                                  |
| fluocinonide             | NR3C1         | pneumonia                                                                  |
| fluorometholone          | NR3C1         | pneumonia                                                                  |
| flurandrenolide          | NR3C1         | pneumonia                                                                  |
| fluticasone              | NR3C1         | pneumonia                                                                  |
| fluticasone furoate      | NR3C1         | pneumonia                                                                  |
| fluticasone propionate   | NR3C1         | pneumonia                                                                  |
| fondaparinux             | F10           | coagulation of blood                                                       |
| gallium nitrate          | IL1B          | coagulation of blood, endocytosis, synthesis of phospholipid               |
| gefitinib                | EGFR          | entrance of virus                                                          |
| glycopyrrolate           | CHRM3         | coagulation of blood, exocytosis, hiv infection, synthesis of phospholipid |
| halcinonide              | NR3C1         | pneumonia                                                                  |
| halobetasol propionate   | NR3C1         | pneumonia                                                                  |
| hydrocortisone buteprate | NR3C1         | pneumonia                                                                  |
| hydrocortisone butyrate  | NR3C1         | pneumonia                                                                  |
| hydrocortisone cypionate | NR3C1         | pneumonia                                                                  |
| hydrocortisone succinate | NR3C1         | pneumonia                                                                  |
| hydroxyzine              | HRH1          | inflammation of respiratory system, release of virus, viral life cycle     |
| hyoscyamine              | CHRM3         | coagulation of blood, exocytosis, hiv infection, synthesis of phospholipid |

|                              |            |                                                                                  |
|------------------------------|------------|----------------------------------------------------------------------------------|
| icotinib                     | EGFR       | entrance of virus                                                                |
| idraparinux                  | F10        | coagulation of blood                                                             |
| idronoxil                    | XIAP       | viral infection                                                                  |
| indomethacin                 | PLA2G2A    | synthesis of lipid                                                               |
| infiximab                    | TNF        | transport of virus                                                               |
| interferon alfacon-1         | IFNAR1     | release of virus, replication of coronavirus, viral infection, viral life cycle  |
| interferon beta-1a           | IFNAR1     | release of virus, replication of coronavirus, viral infection, viral life cycle  |
| interferon beta-1b           | IFNAR1     | release of virus, replication of coronavirus, viral infection, viral life cycle  |
| ipatasertib                  | AKT1       | exocytosis, hiv infection, infection by rna virus                                |
| ipratropium                  | CHRM3      | coagulation of blood, exocytosis, hiv infection, synthesis of phospholipid       |
| isoflurane                   | CHRNA3     | pulmonary hypertension                                                           |
| ixekizumab                   | IL17A      | coagulation of blood                                                             |
| ketotifen                    | HRH1       | inflammation of respiratory system, release of virus, viral life cycle           |
| lapaquistat                  | FDFT1      | concentration of cholesterol                                                     |
| lapatinib                    | EGFR       | entrance of virus                                                                |
| lazertinib                   | EGFR       | entrance of virus                                                                |
| levamisole                   | CHRNA3     | release of virus, replication of coronavirus                                     |
| levocabastine                | HRH1       | inflammation of respiratory system, release of virus, viral life cycle           |
| levocetirizine               | HRH1       | inflammation of respiratory system, release of virus, viral life cycle           |
| loratadine                   | HRH1       | inflammation of respiratory system, release of virus, viral life cycle           |
| loteprednol etabonate        | NR3C1      | pneumonia                                                                        |
| loxapine                     | HRH1       | inflammation of respiratory system, release of virus, viral life cycle           |
| marimastat                   | MMP1, MMP9 | coagulation of blood, hiv infection, replication of coronavirus, viral infection |
| mecamylamine                 | CHRNA3     | pulmonary hypertension                                                           |
| meclizine                    | HRH1       | inflammation of respiratory system, release of virus, viral life cycle           |
| mepenzolic acid              | CHRM3      | coagulation of blood, exocytosis, hiv infection, synthesis of phospholipid       |
| methylprednisolone           | NR3C1      | pneumonia                                                                        |
| methylprednisolone acetate   | NR3C1      | pneumonia                                                                        |
| methylprednisolone succinate | NR3C1      | pneumonia                                                                        |

|                        |             |                                                                                                                                                    |
|------------------------|-------------|----------------------------------------------------------------------------------------------------------------------------------------------------|
| mirtazapine            | HRH1        | inflammation of respiratory system, release of virus, viral life cycle                                                                             |
| mitapivat              | EIF2AK2     | viral life cycle                                                                                                                                   |
| naquotinib             | EGFR        | entrance of virus                                                                                                                                  |
| nazartinib             | EGFR        | entrance of virus                                                                                                                                  |
| neratinib              | EGFR        | entrance of virus                                                                                                                                  |
| nimotuzumab            | EGFR        | entrance of virus                                                                                                                                  |
| nintedanib             | SRC         | coagulation of blood, entrance of virus, exocytosis                                                                                                |
| nitazoxanide           | POR         | clathrin mediated endocytosis, concentration of cholesterol, entrance of virus                                                                     |
| olanzapine             | CHRM3, HRH1 | coagulation of blood, exocytosis, hiv infection, inflammation of respiratory system, release of virus, synthesis of phospholipid, viral life cycle |
| olopatadine            | HRH1        | inflammation of respiratory system, release of virus, viral life cycle                                                                             |
| opipramol              | HRH1        | inflammation of respiratory system, release of virus, viral life cycle                                                                             |
| orphenadrine           | CHRM3, HRH1 | coagulation of blood, exocytosis, hiv infection, inflammation of respiratory system, release of virus, synthesis of phospholipid, viral life cycle |
| osimertinib            | EGFR        | entrance of virus                                                                                                                                  |
| oxybutynin             | CHRM3       | coagulation of blood, exocytosis, hiv infection, synthesis of phospholipid                                                                         |
| pactimibe              | SOAT1       | concentration of cholesterol                                                                                                                       |
| paliperidone           | HRH1        | inflammation of respiratory system, release of virus, viral life cycle                                                                             |
| paliperidone palmitate | HRH1        | inflammation of respiratory system, release of virus, viral life cycle                                                                             |
| pegaptanib             | VEGFA       | entrance of virus, synthesis of phospholipid                                                                                                       |
| pegcetacoplan          | C3          | hiv infection                                                                                                                                      |
| pegintron              | IFNAR1      | release of virus, replication of coronavirus, viral infection, viral life cycle                                                                    |
| perifosine             | AKT1        | exocytosis, hiv infection, infection by rna virus                                                                                                  |
| pheniramine            | HRH1        | inflammation of respiratory system, release of virus, viral life cycle                                                                             |
| pomalidomide           | TNF         | transport of virus                                                                                                                                 |
| prednisolone           | NR3C1       | pneumonia                                                                                                                                          |
| prednisolone acetate   | NR3C1       | pneumonia                                                                                                                                          |
| prednisolone phosphate | NR3C1       | pneumonia                                                                                                                                          |
| prednisone             | NR3C1       | pneumonia                                                                                                                                          |
| prinomastat            | MMP9        | hiv infection, replication of coronavirus, viral infection                                                                                         |
| probucol               | ABCA1       | concentration of cholesterol                                                                                                                       |
| promethazine           | HRH1        | inflammation of respiratory system, release of virus, viral life cycle                                                                             |

|                        |            |                                                                                  |
|------------------------|------------|----------------------------------------------------------------------------------|
| propranolol            | CHRM3      | coagulation of blood, exocytosis, hiv infection, synthesis of phospholipid       |
| pyrotinib              | EGFR       | entrance of virus                                                                |
| quetiapine             | HRH1       | inflammation of respiratory system, release of virus, viral life cycle           |
| quinidine              | CHRM3      | coagulation of blood, exocytosis, hiv infection, synthesis of phospholipid       |
| ranibizumab            | VEGFA      | entrance of virus, synthesis of phospholipid                                     |
| rasagiline             | BCL2       | release of virus                                                                 |
| rebimastat             | MMP1, MMP9 | coagulation of blood, hiv infection, replication of coronavirus, viral infection |
| recombinant interferon | IFNAR1     | release of virus, replication of coronavirus, viral infection, viral life cycle  |
| resatorvid             | TLR4       | coagulation of blood                                                             |
| revefenacin            | CHRM3      | coagulation of blood, exocytosis, hiv infection, synthesis of phospholipid       |
| rimezolone             | NR3C1      | pneumonia                                                                        |
| risperidone            | HRH1       | inflammation of respiratory system, release of virus, viral life cycle           |
| rivaroxaban            | F10        | coagulation of blood                                                             |
| rociletinib            | EGFR       | entrance of virus                                                                |
| rocuronium             | CHRNA3     | pulmonary hypertension                                                           |
| rolapitant             | TAC1       | coagulation of blood, inflammation of respiratory system                         |
| saracatinib            | SRC        | coagulation of blood, entrance of virus, exocytosis                              |
| scopolamine            | CHRM3      | coagulation of blood, exocytosis, hiv infection, synthesis of phospholipid       |
| secukinumab            | IL17A      | coagulation of blood                                                             |
| selonsertib            | MAP3K5     | fibrosis, pulmonary hypertension                                                 |
| siltuximab             | IL6        | coagulation of blood, endocytosis, transport of virus                            |
| solifenacin            | CHRM3      | coagulation of blood, exocytosis, hiv infection, synthesis of phospholipid       |
| succinylcholine        | CHRNA3     | pulmonary hypertension                                                           |
| sucrafate              | FGF2       | respiratory failure                                                              |
| tazarotene             | RXRB       | inflammation of respiratory system                                               |
| tesevatinib            | EGFR       | entrance of virus                                                                |
| tesmilifene            | HRH1       | inflammation of respiratory system, release of virus, viral life cycle           |
| thalidomide            | TNF        | transport of virus                                                               |
| tifacogin              | F10        | coagulation of blood                                                             |
| tiotropium             | CHRM3      | coagulation of blood, exocytosis, hiv infection, synthesis of phospholipid       |
| tirofiban              | ITGB3      | entrance of virus                                                                |
| tolterodine            | CHRM3      | coagulation of blood, exocytosis, hiv infection, synthesis of phospholipid       |

|                         |                    |                                                                            |
|-------------------------|--------------------|----------------------------------------------------------------------------|
| triamcinolone           | NR3C1              | pneumonia                                                                  |
| triamcinolone acetonide | NR3C1              | pneumonia                                                                  |
| tropicamide             | CHRM3              | coagulation of blood, exocytosis, hiv infection, synthesis of phospholipid |
| trospium                | CHRM3              | coagulation of blood, exocytosis, hiv infection, synthesis of phospholipid |
| umeclidinium            | CHRM3              | coagulation of blood, exocytosis, hiv infection, synthesis of phospholipid |
| vandetanib              | EGFR               | entrance of virus                                                          |
| vaespladib methyl       | PLA2G2A,<br>PLA2G5 | synthesis of lipid                                                         |
| varlitinib              | EGFR               | entrance of virus                                                          |
| vecuronium              | CHRNA3             | pulmonary hypertension                                                     |
| vorapaxar               | F2R                | exocytosis, synthesis of phospholipid                                      |
| ziprasidone             | HRH1               | inflammation of respiratory system, release of virus, viral life cycle     |
| zoledronic acid         | FDFT1              | concentration of cholesterol                                               |

**Supplementary Table S6: Drugs in clinical trials that are also included in the ML model.**

| <b>Drug</b>        | <b>Number of clinical trials</b> | <b>predicted</b> | <b>consistent</b> | <b>inconsistent</b> |
|--------------------|----------------------------------|------------------|-------------------|---------------------|
| Hydroxychloroquine | 191                              |                  |                   |                     |
| Tocilizumab        | 43                               | X                |                   |                     |
| Enoxaparin         | 25                               | X                | X                 |                     |
| Dexamethasone      | 21                               | X                | X                 |                     |
| Methylprednisolone | 20                               | X                | X                 |                     |
| Nitazoxanide       | 19                               | X                | X                 |                     |
| Anakinra           | 17                               | X                | X                 |                     |
| Ruxolitinib        | 16                               | X                |                   |                     |
| Baricitinib        | 12                               | X                |                   |                     |
| Interferonbeta-1a  | 12                               | X                | X                 |                     |
| Sarilumab          | 10                               |                  |                   |                     |
| Aspirin            | 10                               | X                |                   | X                   |
| Losartan           | 10                               |                  |                   |                     |
| Rivaroxaban        | 9                                | X                | X                 |                     |
| Clazakizumab       | 8                                | X                |                   |                     |
| Acalabrutinib      | 8                                |                  |                   |                     |
| Isotretinoin       | 7                                |                  |                   |                     |
| Prednisone         | 6                                | X                | X                 |                     |
| Telmisartan        | 6                                | X                |                   |                     |
| Canakinumab        | 6                                | X                |                   |                     |
| Interferonbeta-1b  | 6                                | X                | X                 |                     |
| Hydrocortisone     | 6                                | X                | X                 |                     |
| Famotidine         | 5                                |                  |                   |                     |
| Tofacitinib        | 5                                | X                |                   |                     |
| Mavrilimumab       | 5                                |                  |                   |                     |
| Opaganib           | 4                                |                  |                   |                     |
| Sargramostim       | 4                                |                  |                   |                     |
| Apixaban           | 4                                | X                | X                 |                     |
| Budesonide         | 4                                | X                |                   | X                   |
| Ciclesonide        | 4                                | X                | X                 |                     |
| Maraviroc          | 4                                | X                |                   | X                   |
| Ibrutinib          | 3                                |                  |                   |                     |
| Naltrexone         | 3                                | X                |                   |                     |
| Bevacizumab        | 3                                | X                |                   |                     |
| Bicalutamide       | 3                                |                  |                   |                     |
| Sirolimus          | 3                                |                  |                   |                     |

|                 |   |   |   |   |
|-----------------|---|---|---|---|
| Dipyridamole    | 3 |   |   |   |
| Nintedanib      | 3 | X | X |   |
| Pioglitazone    | 3 | X |   |   |
| Imatinib        | 3 | X |   | X |
| Fostamatinib    | 3 |   |   |   |
| Nivolumab       | 3 |   |   |   |
| Linagliptin     | 3 |   |   |   |
| Prednisolone    | 3 | X | X |   |
| Nicotine        | 3 | X |   |   |
| Abatacept       | 2 |   |   |   |
| Crizanlizumab   | 2 |   |   |   |
| Disulfiram      | 2 | X |   | X |
| Duvelisib       | 2 |   |   |   |
| Ebselen         | 2 | X |   |   |
| Eculizumab      | 2 |   |   |   |
| Fluoxetine      | 2 |   |   |   |
| Fluvoxamine     | 2 |   |   |   |
| Infliximab      | 2 | X | X |   |
| Pentoxifylline  | 2 |   |   |   |
| Ravulizumab     | 2 |   |   |   |
| Siltuximab      | 2 | X | X |   |
| Tranexamicacid  | 2 |   |   |   |
| Enzalutamide    | 2 |   |   |   |
| Sildenafil      | 2 |   |   |   |
| Thalidomide     | 2 | X | X |   |
| Fondaparinux    | 2 | X | X |   |
| Ibuprofen       | 2 | X |   | X |
| Iloprost        | 2 |   |   |   |
| Naproxen        | 1 | X |   | X |
| Ambrisentan     | 1 |   |   |   |
| Amiodarone      | 1 |   |   |   |
| Aprepitant      | 1 |   |   |   |
| Aprotinin       | 1 |   |   |   |
| Argatroban      | 1 | X | X |   |
| Bardoxolone     | 1 |   |   |   |
| Bivalirudin     | 1 | X | X |   |
| Candesartan     | 1 |   |   |   |
| Captopril       | 1 |   |   |   |
| Decitabine      | 1 | X |   |   |
| Diphenhydramine | 1 | X | X |   |

|               |   |   |   |   |
|---------------|---|---|---|---|
| Dutasteride   | 1 |   |   |   |
| Edoxaban      | 1 | X | X |   |
| Eritoran      | 1 | X | X |   |
| Estradiol     | 1 |   |   |   |
| Icatibant     | 1 |   |   |   |
| Indomethacin  | 1 | X | X |   |
| Isoflurane    | 1 | X | X |   |
| Ketotifen     | 1 | X | X |   |
| Lenalidomide  | 1 |   |   |   |
| Levamisole    | 1 | X | X |   |
| Masitinib     | 1 |   |   |   |
| Mefloquine    | 1 |   |   |   |
| Mometasone    | 1 | X |   | X |
| Ozanimod      | 1 |   |   |   |
| Pacritinib    | 1 | X |   |   |
| Prazosin      | 1 |   |   |   |
| Proxalutamide | 1 |   |   |   |
| Quetiapine    | 1 | X | X |   |
| Ramipril      | 1 |   |   |   |
| Regadenoson   | 1 |   |   |   |
| Rintatolimod  | 1 | X |   |   |
| Secukinumab   | 1 | X | X |   |
| Semaglutide   | 1 |   |   |   |
| Senicapoc     | 1 |   |   |   |
| Sitagliptin   | 1 |   |   |   |
| Spirolactone  | 1 |   |   |   |
| Tacrolimus    | 1 |   |   |   |
| Tenecteplase  | 1 |   |   |   |
| Tirofiban     | 1 | X | X |   |
| Toremifene    | 1 |   |   |   |
| Tramadol      | 1 |   |   |   |
| Ulinastatin   | 1 | X |   |   |
| Valsartan     | 1 |   |   |   |
| Zanubrutinib  | 1 |   |   |   |
